# Supplementary material for: Physical Peculiarity of Two Sites in Human Promoters: Universality and Diverse Usage in Gene Function
Source: MDPI journal article supplement (doi:10.3390/ijms25031487), 2024-01-25
Supplement: s1 [file s1]

# Supplementary Tables and Figures

## Physical Peculiarity of Two Sites in Human Promoters: Universality and Diverse Usage in Gene Function

Kohei Uemura<sup>1</sup> and Takashi Ohyama<sup>1,2,\*</sup>

<sup>1</sup> Major in Integrative Bioscience and Biomedical Engineering, Graduate School of Science and Engineering, Waseda University, 2-2Wakamatsu-cho, Shinjuku-ku, Tokyo 162-8480, Japan; uemurakohei@fuji.waseda.jp

<sup>2</sup> Department of Biology, Faculty of Education and Integrated Arts and Sciences, Waseda University, 2-2 Wakamatsu-cho, Shinjuku-ku, Tokyo 162-8480, Japan

\* Correspondence: ohyama@waseda.jp

### Contents

**Supplementary Table S1.** Known human CPEs for transcription by Pol II.

**Supplementary Table S2.** Ratios of CPE(s)-containing human Pol II gene promoters.

**Supplementary Table S3.** Numerical values for DPPs at each position of the aligned all human Pol II gene promoters.

**Supplementary Table S4.** Numerical values for DPPs at each position of the aligned core-less promoters.

**Supplementary Table S5.** Numerical values for DPPs at each position of the aligned Inr-containing promoters.

**Supplementary Table S6.** Numerical values for DPPs at each position of the aligned TATA-containing promoters.

**Supplementary Table S7.** Canonical position(s) for the occurrence of distinctive DPPs.

**Supplementary Table S8.** Numerical values for DPPs at each position of the aligned promoters of the cluster 1 genes in Fig. 5a.

**Supplementary Table S9.** Numerical values for DPPs at each position of the aligned promoters of the cluster 2 genes in Fig. 5a.

**Supplementary Table S10.** Numerical values for DPPs at each position of the aligned promoters of the cluster 3 genes in Fig. 5a.

**Supplementary Table S11.** Numerical values for DPPs at each position of the aligned promoters of the cluster 4 genes in Fig. 5a.

**Supplementary Table S12.** Proportions of two built-in marks.

**Supplementary Figure S1.** Non-abbreviated version of Fig. 5e.

**Supplementary Figure S2.** Non-abbreviated version of Fig. 6a.

**Supplementary Table S1.** Known human CPEs for transcription by Pol II.

| CPE <sup>1</sup> | Consensus sequence <sup>2</sup> | Position <sup>3</sup> | Reference                                                                                                                                                                           |
|------------------|---------------------------------|-----------------------|-------------------------------------------------------------------------------------------------------------------------------------------------------------------------------------|
| TATA box         | TATAWAWR                        | −31 - −24             | Goldberg, M. L., Thesis, Stanford University, Stanford, CA, USA, 1979<br>Bucher, P., <i>J. Mol. Biol.</i> <b>1990</b> , <i>212</i> , 563–578                                        |
| Inr              | BBCABW                          | −3 - +3               | Javahery, R.; et al., <i>Mol. Cell Biol.</i> <b>1994</b> , <i>14</i> , 116–127<br>Smale, S. T.; et al., <i>Cold Spring Harb. Symp. Quant. Biol.</i> <b>1998</b> , <i>63</i> , 21–31 |
| TCT              | YYCTTTY                         | −2 - +6               | Parry, T. J.; et al., <i>Genes Dev.</i> <b>2010</b> , <i>24</i> , 2013–2018                                                                                                         |
| DPE (RGWCGTG)    | RGWCGTG                         | +28 - +34             | Burke, T. W.; Kadonaga, J. T., <i>Genes Dev.</i> <b>1997</b> , <i>11</i> , 3020–3031                                                                                                |
| DPE (RGWYVT)     | RGWYVT                          | +28 - +33             | Burke, T. W.; Kadonaga, J. T., <i>Genes Dev.</i> <b>1997</b> , <i>11</i> , 3020–3031                                                                                                |
| BREu             | SSRCGCC                         | −38 - −32             | Lagrange, T.; et al., <i>Genes Dev.</i> <b>1998</b> , <i>12</i> , 34–44                                                                                                             |
| BREd             | RTDKKKK                         | −23 - −17             | Deng, W.; Roberts, S.G.E.; <i>Genes Dev.</i> <b>2005</b> , <i>19</i> , 2418–2423                                                                                                    |
| DRE              | WATCGATW                        | −100 - −1             | Hirose, F.; et al., <i>J. Biol. Chem.</i> <b>1993</b> , <i>268</i> , 2092–2099                                                                                                      |
| XCPE1            | DSGYGGRASM                      | −8 - +2               | Tokusumi, Y.; et al., <i>Mol. Cell. Biol.</i> <b>2007</b> , <i>27</i> , 1844–1858                                                                                                   |
| XCPE2            | VCYCRTTRCMY                     | −9 - +2               | Anish, R.; et al., <i>PLoS ONE</i> <b>2009</b> , <i>4</i> , e5103                                                                                                                   |
| Pause button     | KCGRWCG                         | +25 - +35             | Hendrix, D.A.; et al., <i>Proc. Natl Acad. Sci. USA</i> <b>2008</b> , <i>105</i> , 7762–7767                                                                                        |
| DCEI             | CTTC                            | +6 - +11              | Lewis, B. A., et al., <i>Proc. Natl Acad. Sci. USA</i> <b>2000</b> , <i>97</i> , 7172–7177                                                                                          |
| DCEII            | CTGT                            | +16 - +21             | Lewis, B. A., et al., <i>Proc. Natl Acad. Sci. USA</i> <b>2000</b> , <i>97</i> , 7172–7177                                                                                          |
| DCEIII           | AGC                             | +30 - +34             | Lewis, B. A., et al., <i>Proc. Natl Acad. Sci. USA</i> <b>2000</b> , <i>97</i> , 7172–7177                                                                                          |

<sup>1</sup>Core promoter element, <sup>2</sup>B = C or G or T; D = A or G or T; K = G or T; M = A or C; R = A or G; S = C or G; V = A or C or G; W = A or T; Y = C or T.

<sup>3</sup>Relative to the TSS.

**Supplementary Table S2.** Ratios of CPE(s)-containing human Pol II gene promoters.

| CPE(s) <sup>1</sup>             | Count  | Ratio (%) |
|---------------------------------|--------|-----------|
| Core-less                       | 12,031 | 57.1      |
| Inr                             | 5,575  | 26.5      |
| DPE                             | 598    | 2.8       |
| BREd                            | 511    | 2.4       |
| BREu                            | 468    | 2.2       |
| TATA                            | 295    | 1.4       |
| Inr + DPE                       | 290    | 1.4       |
| BREd + Inr                      | 212    | 1.0       |
| TCT                             | 186    | 0.9       |
| Inr + TATA                      | 171    | 0.8       |
| BREu + Inr                      | 158    | 0.8       |
| Pause button                    | 151    | 0.7       |
| XCPE1                           | 58     | 0.3       |
| Inr + Pause button              | 41     | 0.2       |
| TATA + DPE                      | 31     | 0.1       |
| Inr + TCT                       | 29     | 0.1       |
| BREd + DPE                      | 28     | 0.1       |
| DCE                             | 19     | 0.1       |
| Inr + DCE                       | 17     | 0.1       |
| TCT + DPE                       | 14     | 0.1       |
| BREd + TATA                     | 13     | 0.1       |
| BREd + Inr + DPE                | 12     | 0.1       |
| BREu + Pause button             | 11     | 0.1       |
| BREd + BREu                     | 9      | 0.0       |
| BREd + TCT                      | 9      | 0.0       |
| BREu + DPE                      | 9      | 0.0       |
| Pause button + DPE              | 8      | 0.0       |
| Inr + TATA + DPE                | 7      | 0.0       |
| Inr + XCPE1                     | 7      | 0.0       |
| DRE                             | 6      | 0.0       |
| BREd + XCPE1                    | 5      | 0.0       |
| BREu + XCPE1                    | 5      | 0.0       |
| Inr + Pause button + DPE        | 5      | 0.0       |
| Inr + XCPE2                     | 5      | 0.0       |
| BREd + Inr + TATA               | 4      | 0.0       |
| BREu + Inr + DPE                | 4      | 0.0       |
| BREu + Inr + Pause button + DPE | 4      | 0.0       |
| BREu + TCT                      | 4      | 0.0       |
| BREd + BREu + Inr               | 3      | 0.0       |
| BREd + Inr + TCT                | 3      | 0.0       |

|                                 |       |      |
|---------------------------------|-------|------|
| BREd + Pause button             | 3     | 0.0  |
| Inr + TCT + DPE                 | 3     | 0.0  |
| TATA + TCT                      | 3     | 0.0  |
| TATA + TCT + DPE                | 3     | 0.0  |
| BREd + DCE                      | 2     | 0.0  |
| BREu + Inr + Pause button       | 2     | 0.0  |
| BREu + TCT + DPE                | 2     | 0.0  |
| Pause button + XCPE1            | 2     | 0.0  |
| XCPE2                           | 2     | 0.0  |
| BREd + BREu + DPE               | 1     | 0.0  |
| BREd + Inr + Pause button       | 1     | 0.0  |
| BREd + TATA + XCPE1             | 1     | 0.0  |
| BREd + XCPE1 + DPE              | 1     | 0.0  |
| BREu + Inr + XCPE1              | 1     | 0.0  |
| BREu + Pause button + DPE       | 1     | 0.0  |
| BREu + Pause button + XCPE1     | 1     | 0.0  |
| BREu + TATA                     | 1     | 0.0  |
| BREu + XCPE2                    | 1     | 0.0  |
| DCE + DPE                       | 1     | 0.0  |
| DRE + Inr + TCT                 | 1     | 0.0  |
| DRE + TATA                      | 1     | 0.0  |
| Inr + DCE + DPE                 | 1     | 0.0  |
| Inr + Pause button + TATA + DPE | 1     | 0.0  |
| Inr + TATA + DCE                | 1     | 0.0  |
| Inr + XCPE1 + DPE               | 1     | 0.0  |
| Pause button + TATA             | 1     | 0.0  |
| XCPE1 + DPE                     | 1     | 0.0  |
| <hr/>                           |       |      |
| TATA-containing promoters       | 533   | 2.5  |
| Inr-containing promoters        | 6,559 | 31.2 |
| Other CPE-containing promoters  | 1,933 | 9.2  |

<sup>1</sup>Core promoter element(s).

**Supplementary Table S3.** Numerical values for DPPs at each position of the aligned all human Pol II gene promoters.

<separate .xlsx file>

**Supplementary Table S4.** Numerical values for DPPs at each position of the aligned core-less promoters.

<separate .xlsx file>

**Supplementary Table S5.** Numerical values for DPPs at each position of the aligned Inr-containing promoters.

<separate .xlsx file>

**Supplementary Table S6.** Numerical values for DPPs at each position of the aligned TATA-containing promoters.

<separate .xlsx file>

**Supplementary Table S7.** Canonical position(s) for the occurrence of distinctive DPPs.

| DPPs                             | Group    | Maximum value | Minimum value | Maximum rate of change | Minimum rate of change |
|----------------------------------|----------|---------------|---------------|------------------------|------------------------|
| DNA denaturability               | <i>e</i> | +1 or -27     | —             | +2 or -26              | -2 or -31              |
| Duplex disrupt energy            | <i>e</i> | —             | 0 or -27      | -1 or -31              | +2 or -26              |
| Duplex DNA free energy           | <i>e</i> | 0 or -27      | —             | +2 or -26              | -1 or -31              |
| Base stacking energy             | <i>e</i> | -1 or -27     | -2            | -1 or -25              | -2 or -32              |
| DNA bending stiffness            | <i>m</i> | —             | +1 or -27     | -2 or -32              | +2 or -26              |
| Protein-induced deformability    | <i>m</i> | -1            | 0 or -26      | -1 or -29              | -2 or -26              |
| Flexibility                      | <i>m</i> | -1 or -30     | 0, -4 or -26  | -1 or -28              | 0 or -25               |
| Rigidity                         | <i>m</i> | -4, 0 or -27  | -2            | -4 or -26              | -1 or -29              |
| Stabilizing energy of Z DNA (AS) | <i>z</i> | 0, -2 or -28  | -1            | -2 or -26              | -1 or -31              |
| Stabilizing energy of Z DNA (SA) | <i>z</i> | -1 or -27     | -2 or 0       | -1 or -25              | -2 or -32              |

**Supplementary Table S8.** Numerical values for DPPs at each position of the aligned promoters of the cluster 1 genes in Fig. 5a.

<separate .xlsx file>

**Supplementary Table S9.** Numerical values for DPPs at each position of the aligned promoters of the cluster 2 genes in Fig. 5a.

<separate .xlsx file>

**Supplementary Table S10.** Numerical values for DPPs at each position of the aligned promoters of the cluster 3 genes in Fig. 5a.

<separate .xlsx file>

**Supplementary Table S11.** Numerical values for DPPs at each position of the aligned promoters of the cluster 4 genes in Fig. 5a.

<separate .xlsx file>

**Supplementary Table S12.** Proportions of two built-in marks.

| The 1st<br>mark | The 2nd<br>mark | All genes |           | Genes with a core-less<br>promoter |           |
|-----------------|-----------------|-----------|-----------|------------------------------------|-----------|
|                 |                 | Count     | Ratio (%) | Count                              | Ratio (%) |
| +               | +               | 15,604    | 74.1      | 9,032                              | 75.1      |
| +               | –               | 523       | 2.5       | 335                                | 2.8       |
| + or –          | +               | 20,404    | 96.9      | 11,619                             | 96.6      |
| –               | +               | 4,800     | 22.8      | 2,587                              | 21.5      |
| –               | –               | 129       | 0.6       | 77                                 | 0.6       |
| +               | + or –          | 16,127    | 76.6      | 9,109                              | 75.7      |

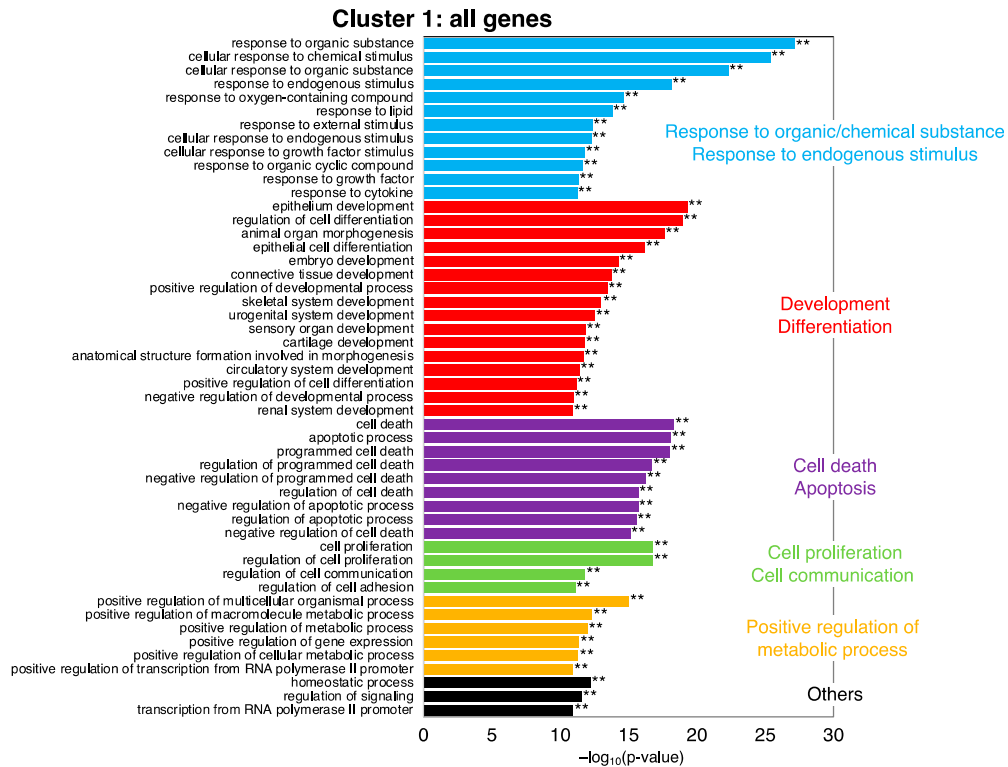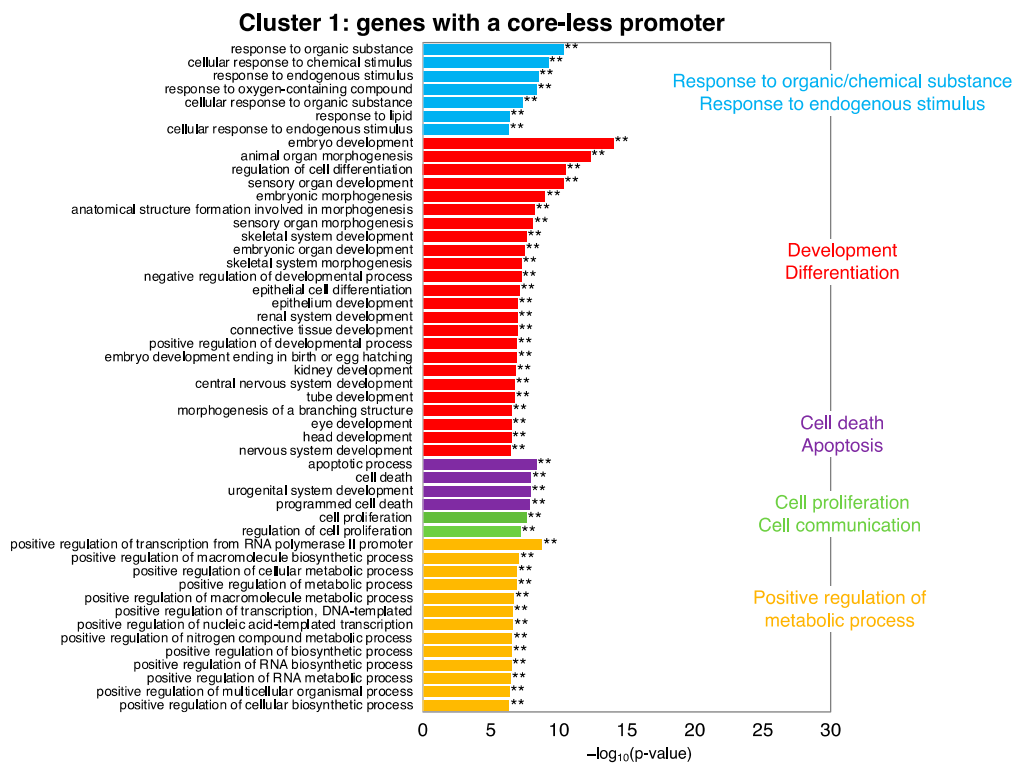



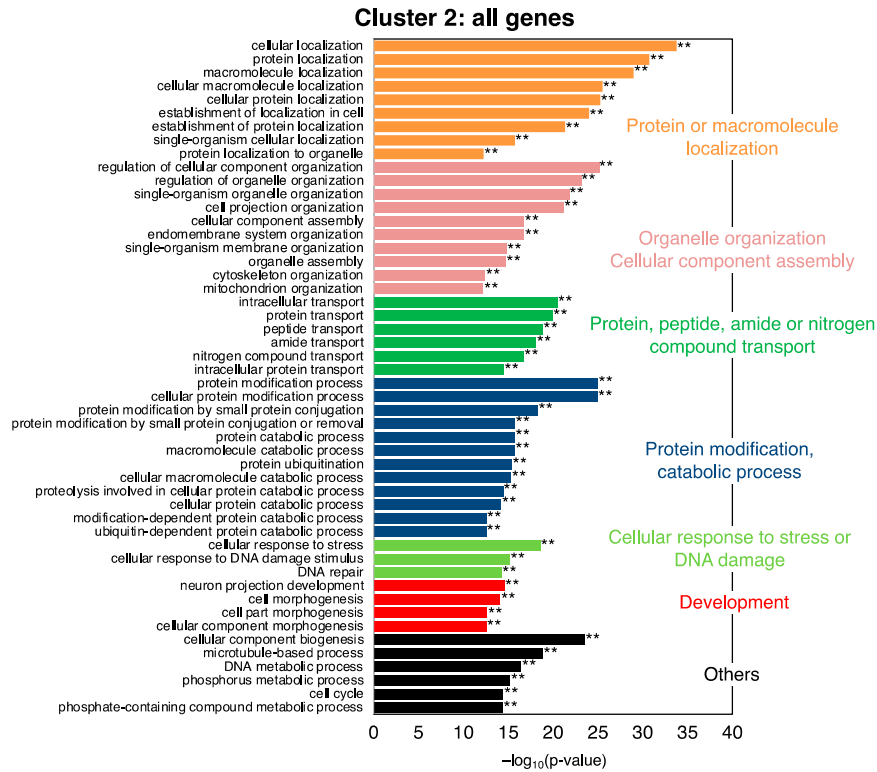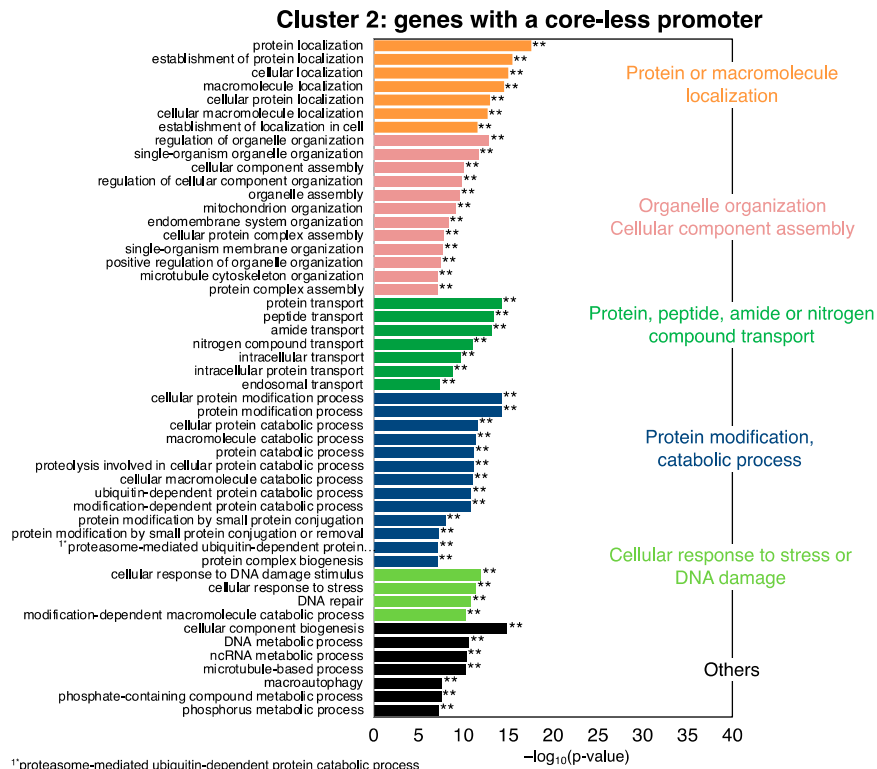

<sup>1</sup>proteasome-mediated ubiquitin-dependent protein catabolic process

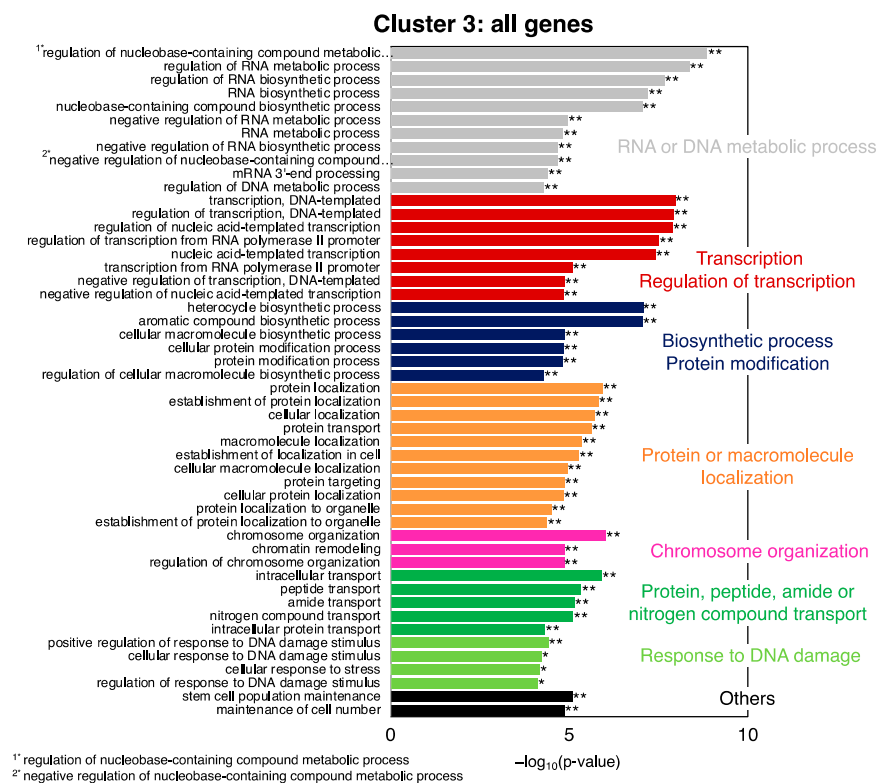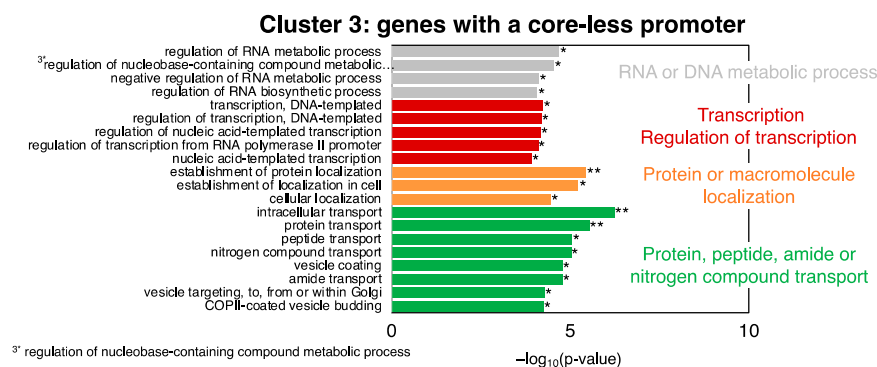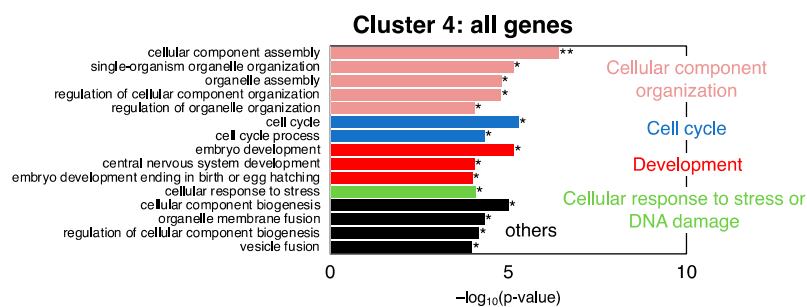

#### Cluster 4: genes with a core-less promoter

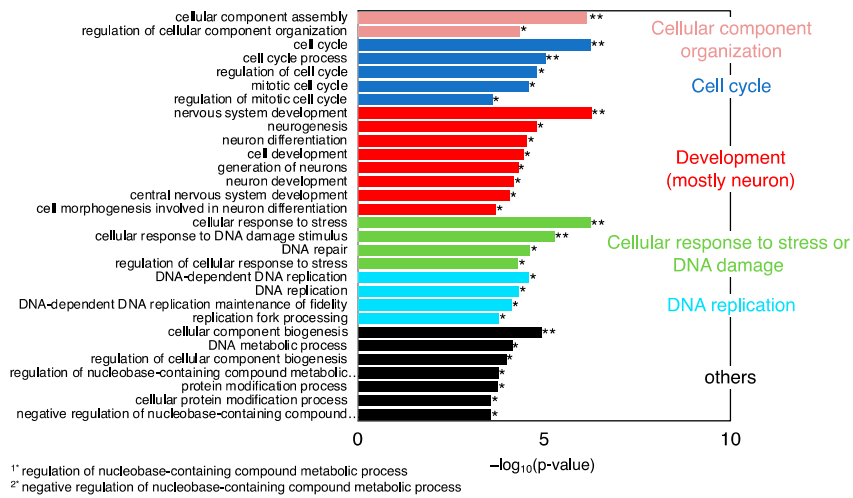

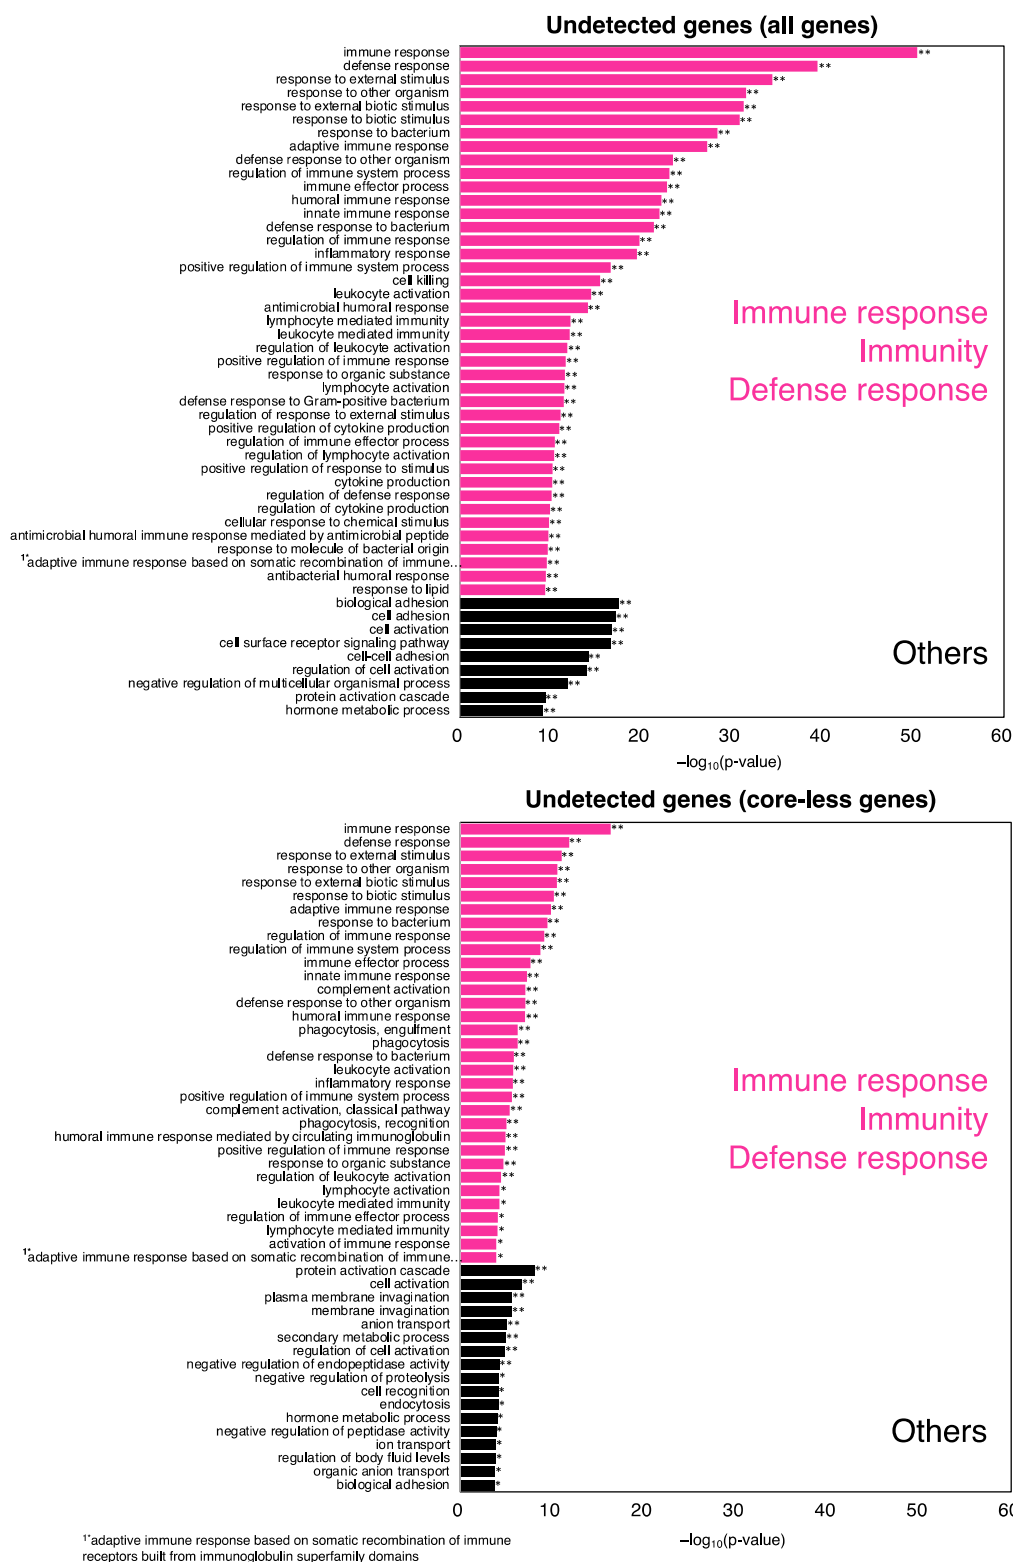

**Supplementary Figure S2.** Non-abbreviated version of Fig. 6a.
